# Supplementary material
Source: MDPI journal article supplement (https://www.mdpi.com/2297-8739/9/5/112)
Supplement: s1 [file s1]

# Analysis of differentially expressed proteins and modifications induced by formaldehyde using LC-MS/MS

Ranran Liu <sup>1,†</sup>, Yue Han <sup>1,†</sup>, Zhiyue Wu <sup>1</sup>, Jianji Zhang <sup>1</sup>, Yong Zang <sup>1</sup>, Lijin Shen <sup>2,\*</sup>, Shanshan Tian <sup>1,\*</sup> and Kai Zhang <sup>1,\*</sup>

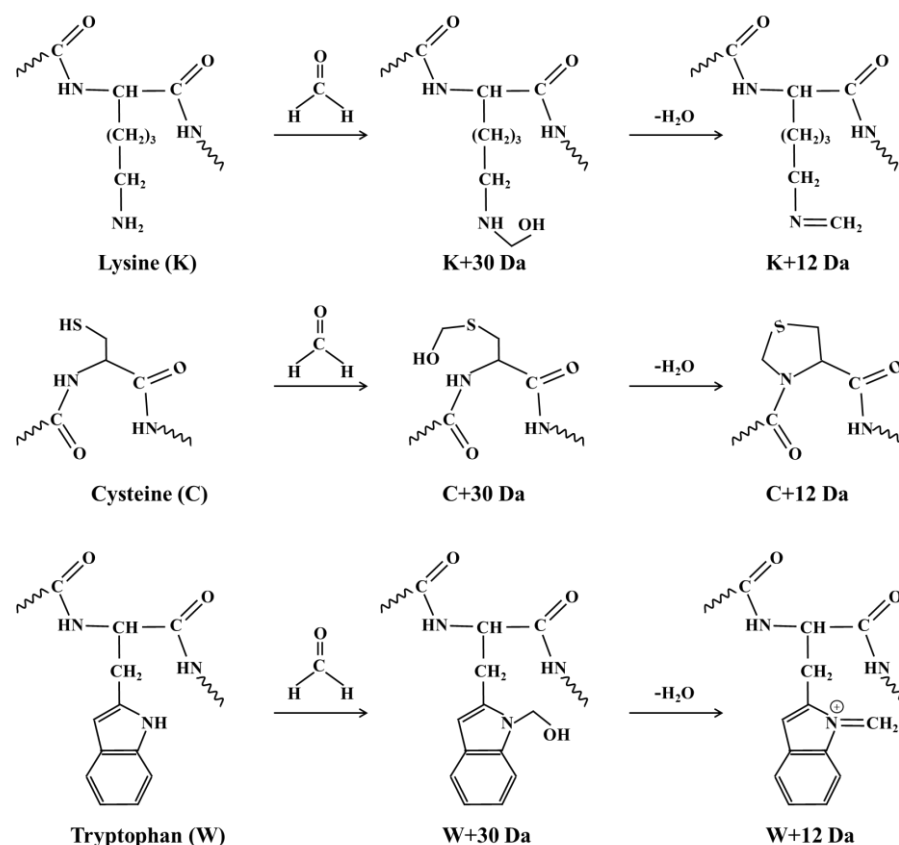

**Figure S1.** Formaldehyde reacts with proteins to produce +30 Da or +12 Da mass shift on lysine, cysteine and tryptophan residues.
